# Supplementary material for: Climatic and extreme weather variations over Mountainous Jammu and Kashmir, India: Physical explanations based on observations and modelling
Source: Copernicus journal article supplement (doi:10.5194/acp-2018-201), 2018-05-22
Supplement: Supplementary file [file acp-2018-201-AC2-supplement.pdf]

**Climate and the September 2014 flood event over Mountainous Jammu and Kashmir, India: Physical explanations based on observations and modelling**  
**Climatic and extreme weather variations over Mountainous Jammu and Kashmir, India: Physical explanations based on observations and modelling**

Sumira Nazir, Zaz<sup>1</sup>, Romshoo Shakil Ahmad<sup>1</sup>, RamkumarThokuluwa Krishnamoorthy<sup>2\*</sup>, and  
YesuBabu Viswanadhapalli<sup>2</sup>

1. Department of Earth Sciences, University of Kashmir, Hazratbal, Srinagar, Jammu and Kashmir-190006, India
2. National Atmospheric Research Laboratory, Dept. of Space, Govt. of India, Gadanki, Andhra Pradesh 517112, India

**Email:**zaz.sumira@gmail.com, shakilrom@kashmiruniversity.ac.in, tkram@narl.gov.in, yesubabu@narl.gov.in;

**\*Corresponding author** (tkram@narl.gov.in)

## **Abstract**

The Himalaya is very sensitive to climatic variations because of its fragile environmental and climatic settings. There are clear and strong indicators of climate change reported for the Himalaya, particularly the Jammu and Kashmir region in the western Himalayas. In this study, the detailed characteristics of long and short term as well as localized variations of temperature and precipitation are analysed for six meteorological stations (Gulmarg, Pahalgam, Kokarnag, Quazigund, Kupwara and Srinagar) over Jammu and Kashmir, India for a period of 37 years during 1980-2016 by making use of observed stations data, WRF model downscaled monthly-averaged surface temperature and precipitation and ERA-interim (ERA-I) reanalysis data. The annual and seasonal temperature and precipitation changes were analysed by carrying out the Student's t-test, Mann-Kendall, Spearman Rho and Cumulative deviation statistical tests. The results show an increase of 0.8°C in average annual temperature over thirty years during 1980-2016 with higher increase in maximum temperature (0.97°C) compared to minimum temperature (0.76°C). Analyses of annual mean temperature at all the stations reveal higher rise at high-altitude stations of Pahalgam (1.13°C) and Gulmarg (1.04°C) at the confidence level of S=99%. Precipitation patterns in the valley show slight decrease in the annual precipitation at Gulmarg and Pahalgam stations at the confidence level of S=90%. Seasonal analyses show increase in the winter and spring temperature at all stations at the confidence level of S=95% with prominent decrease in spring precipitation at S=99%. The present study reveals that variation in temperature and precipitation during northern winter (December - March) has close association with the North Atlantic Oscillation (NAO). Further, the observed temperature data (monthly averaged data for 1980-2016) at all the stations shows good correlation of 0.86 with the results of WRF and therefore the model downscaled simulations can be considered as a valid scientific tool for climatic change studies in this region. Though the correlation between

WRF model and observed precipitation is significantly strong, the WRF model underestimates significantly the rainfall amount. Using ERA-I potential vorticities in the upper troposphere over the Jammu and Kashmir region, it is found that the extreme weather event of September 2014 occurred due to the breaking of intense Rossby wave activity over Kashmir. As the wave could drag lots of water vapour from both the Bay of Bengal and Arabian Sea and dump them over the Kashmir in the region through wave breaking, it is speculated to be resulted in the historical devastating flooding of the whole Kashmir valley in the first week of September 2014, which was accompanied by the extreme rainfall events measuring more than 620 mm in some parts of the PirPanjal range in the South Kashmir.

## 1. Introduction

Climate change is a real Earth's atmospheric and surface phenomenon and the influences of which on all the spheres of life are considered significant everywhere in the world at least in the past few decades. Extreme weather events like anomalously large floods and unusual drought conditions associated with climate change play havoc with livelihoods of even established civilizations particularly in coastal and high-mountainous areas. Jammu and Kashmir, India, located in the Western Himalayan region, is one such cataclysmic mountainous region where the significant influence of climate change on local weather has been observed for the last few decades; (1) shrinking and reducing glaciers, (2) devastating floods, (3) decreasing winter duration and rainfall, (4) increasing summer duration and temperature etc. (Solomon et al., 2007; Kohler and Maselli 2009; Immerzeel et al., 2010; Romshoo et al., 2015; Romshoo et al., 2017). Western disturbances (WD) is considered as one of the main sources of precipitation (in the form of rainfall/snowfall) for the Jammu and Kashmir region, which brings water vapour mainly from the tropical Atlantic Ocean, Mediterranean Sea, Caspian Sea and Black sea. The Indian south-west and north-east monsoons are other important sources during Northern summer and winter seasons respectively. Though WD is perennial, but it is most intense during northern winter (December–~~March~~February~~February~~). Planetary-scale atmospheric Rossby-waves have potential to significantly alter the distribution and movement of WD according to their intensity and duration (few to tens of days). Since WD is controlled by planetary-scale Rossby waves in the whole troposphere of the subtropical latitude region, diagnosing different kinds of precipitation characteristics is easier with the help of potential vorticity (PV) at 350K potential temperature (PT) and 200 ~~hPa~~mb-level pressure surface (PS) as they are considered as proxies for Rossby wave activities (Ertel, 1942; Bartels et al., 1998). For example, Postel and Hitchman (1999) studied the characteristics of Rossby wave breaking (RWB) events occurring at 350K PT surface transecting the subtropical westerly jets. Similarly, Waugh and Polvani (2000) studied RWB characteristics at 350K PT surface in the Pacific region during northern fall–spring with emphasis on their influence on westerly ducts and their intrusion into the tropics. Since PV is a conserved quantity on isentropic and isobaric surfaces (ISOES & ISOBS), it is widely used for investigating large-scale dynamical processes associated with frictionless and adiabatic flows. Moreover, all other dynamical parameters, under a given suitable balanced-atmospheric-background condition, can be derived from PV and boundary conditions [Hoskins et al., 1985].

Divergence of the atmospheric air flows near the upper troposphere is larger during precipitation, leading to increase in the strength of PV. Because of which generally there will be a good positive correlation between variations in the strength of PV in the upper troposphere and precipitation over the ground provided that the precipitation is mainly due to the passage of large-scale atmospheric weather systems like western disturbances, monsoons etc. Wind flows over topography can significantly affect the height distribution of water vapour and precipitation characteristics. Because of this, one can expect that the positive correlation between variations in PV and precipitation be modified significantly depending upon both the topography and wind flow strength. These facts need to be taken into account while finding long-term climatic variations of precipitation near mountainous regions like the western Himalaya. The interplay between the flow of western disturbances and topography of the western Himalaya can further complicate the identification of source mechanisms of extreme weather events like the ones that occurred in the western Himalayan region; 2014 Kashmir floods, 2010 Leh floods, in the Jammu and Kashmir region and 2013 in the Uttarakhand region. This necessitates making use of the proper surrogate parameters like PV and distinguishing between different source mechanisms of extreme weather events associated with both the long-term climatic impacts of remote origin and short-term localized ones like organized convection.

The main aim of the present study is to investigate the climatic variation of surface temperature and precipitation over the Jammu and Kashmir, India region of the western Himalayas in terms of atmospheric Rossby wave activity in the upper troposphere. Since PV is considered as a measure of Rossby wave activity, the present work analyses in detail, for a period of 37 years during 1980-2016, monthly variation of PV (ERA-interim reanalysis data, Dee et al., 2001) in the upper troposphere (at 350 K potential temperature and 200 hPa pressure surfaces) and compares it with observed surface temperature and rainfall (India Meteorological Department, IMD) at six widely separated mountainous locations with variable orographic features (Srinagar, Gulmarg, Pahalgam, Qazigund, Kokarnag and Kupwara). There exist several reports on climatological variation of hydro-meteorological parameters in various parts of the Himalayas. For example, Kumar and Jain (2009) and Bhutiyani et al. (2010) found an increase in the temperature in the north-western Himalayas with significant variations in precipitation patterns. Archer and Fowler (2004) examined temperature data of seven stations in the Karakoram and Hindu Kush Mountains of the Upper Indus River Basin (UIRB) in search of seasonal and annual trends using statistical test like regression analysis. Their results revealed that mean winter maximum-temperature has increased significantly while mean summer minimum-temperature declined consistently. On the contrary, Lui et al. (2009) examined long-term trends in minimum and maximum temperatures over the Tibetan mountain range during 1961-2003 and found that minimum temperature increases faster than maximum temperature in all the months. Romshoo et al. (2015) observed changes in snow precipitation and snow-melt-runoff in the Kashmir valley and attributed the observed depletion of streamflow to the changing climate in the region. Bolch et al. (2012) reported that the glacier extent in the Karakoram range is increasing.

These contrasting findings of long term variations in hydro-meteorological parameters in the Himalayas need to be verified by analyzing more historic climatic data available in the region. However, the sparse and scanty availability of regional climatic data poses challenges in understanding the complex microclimate in this region. Therefore, studying the relationship of recorded regional (Jammu and Kashmir) climatic variations in weather parameters with remote and large-scale weather phenomena such as the North Atlantic Oscillation (NAO), and El Niño Southern Oscillation (ENSO) become a necessity for understanding the physical processes that control the locally observed variations (Ghashmi, 2015). Archer and Fowler (2004) and Iqbal and Kashif (2013) found that large-scale atmospheric circulation like NAO influences significantly the climatic condition of Himalayas. However, detailed information about variation in temperature and precipitation and its teleconnection with observed variations of NAO is inadequately available for this part of the Himalayan region (Kashmir Valley).

## 2. Geographical setting of Kashmir

The intermountainous valley of Kashmir has unique geographical setting and it is located between the Greater Himalayas in the north and Pir Panjal ranges in the south, roughly within the latitude and longitude ranges of  $33^{\circ} 55'$  to  $34^{\circ} 50'$  and  $74^{\circ} 30'$  to  $75^{\circ} 35'$  respectively (Fig. 1). The heights of these mountains range from about 3,000 to 5,000 m and the mountains strongly influence the weather and climate of the region. Generally the topographic setting of the six stations, though variable, could be broadly categorized into two; (1) stations located on plains (Srinagar, Kokarnag, Qazigund and even Kupwara) and (2) those located in the mountain setting (Gulmarg, Pahalgam). Physiographically, the valley of Kashmir is divided into three regions; Jhelum valley floor, Greater Himalayas and Pir Panjal. In order to represent all the regions of the valley, six meteorological stations located widely with different mean sea levels (msl), namely, Gulmarg (2740m), Pahalgam (2600m), Kokarnag (2000m), Srinagar (1600m), Kupwara (1670m) and Qazigund (1650m) were selected for analyses of observed weather parameters. The topographical nature of the surroundings of these six stations (Fig. 1-2) is given below:

1

1. Kupwara: Located on plane surface bounded on three sides by mountains.

2. Pahalgam: Located on mountain top.

3. Kokarnag: Located on plane surface.

4. Srinagar: Located on plane surface in an urbanized area.

5. Gulmarg: Located on mountain top.

6. Qazigund: Located on plane surface.

The Kashmir valley is one of the important watersheds of the upper Indus basin harbouring more than 105 glaciers and it experiences the Mediterranean type of climate with marked seasonality (Romshoo and Rashid, 2014). Broadly, four seasons (Khattak et al 2011; Rashid et al., 2015) are defined for the Kashmir valley; winter (December to February), spring (March to May), summer (June to August), and autumn (September to November). It is to be clarified that with respect to NAO (Fig. 4) only, it is considered December-March as winter months and in all other parts of the manuscript, December-February is considered as winter season as per the IMD definition. This is because, for the NAO index, normally December-March is considered as northern winter and we adopted the same

**Formatted:** Indent: First line: 0", Line spacing: single

**Formatted:** Font: 10 pt

**Formatted:** Font: 10 pt, Not Bold

definition here(Archer and Fowler, 2004;Iqbal and Kashif,2013). The result of linkage between winter NAO index and Kashmir precipitation does not affect other results of the present work. The annual temperature in the valley varies from about -10°C to 35°C. The rainfall pattern in the valley is dominated by winter time precipitation associated with western disturbances (Dar et al., 2014) while the snow precipitation is received mainly in winter and early spring season (Kaul and Qadri, 1979).

Formatted: Font: 10 pt, Not Bold

### 3. Data and Methodology

India Meteorological Department (IMD) provided 37 years (1980-2016) of data of daily precipitation, maximum temperature and minimum temperature for all these six stations. Monthly averaged data were further analysed to find long term variations of the weather parameters. Statistical tests including Mann-Kendall, Spearman Rho, Cumulative deviation, Student's t-test were performed to determine long term trends and turning point of weather parameters with statistical significances. Similar analyses and tests were performed also for the Weather and Research Forecasting (WRF) model simulated and ERA-Interim reanalyses data (0.75° by 0.75° spatial resolution in the horizontal plane, monthly averaged time resolution) of same weather parameters and for the NAO index. Brief information about these datasets is provided below.

#### 3.1.Observational and model datasets used in this study

The obtained observational data were carefully analysed for homogeneity and missing values. Analyses of ratios of temperature from the neighbouring stations with the Srinagar station were conducted using relative homogeneity test (WMO, 1970). It is found that there is no significant inhomogeneity and data gap for any station. Few missing data points were linearly interpolated and enough care was taken not to make any meaningful interpretation during such short periods of data gap in the observations. Annual and seasonal means of temperature and precipitation were calculated for all the stations and years. To compute seasonal means, the data were divided into the following seasons: winter (December to February), spring (March to May), summer (June to August) and autumn (September to November). Trends in the annual and seasonal means of temperature and precipitation were determined using Mann-Kendall (non-parametric test) and linear regression tests (parametric test) at the confidence level of  $S=99\%$ ,  $S=95\%$  and  $S=90\%$ . These tests have been extensively used in hydrometeorological data analyses as they are less sensitive to heterogeneity of data distribution and least affected by extreme values or outliers in data series. Various methods have been applied to determine change points of a time series (Radziejewski et al., 2000; Chen and Gupta, 2012). In this study, change point in time series of temperature and precipitation was identified using cumulative deviation test (Pettitt, 1979). This method detects the time of significant change in the mean of a time series when the exact time of the change is unknown (Gao et al., 2011).

The data of winter NAO index during 1980–2010 from Climatic Research Unit were obtained for analyses from the web link <http://cru@uea.ac.uk>. The winter (December - March) NAO index is based on the difference of normalized sea level pressure (SLP) between Lisbon, Portugal and Iceland, which is available from 1964 onwards. Positive NAO index is associated with stronger-than-average westerlies over the middle latitudes (Hurrell, 1997). Correlation between climatic variations of mean (December-March) temperature, precipitation and NAO index was determined using Pearson correlation coefficient method. To test whether the observed trends in winter temperature and precipitation are enforced by NAO, linear regression analysis (forecast) was performed (Fig. 4e and f). The following algorithm from Microsoft Excel defines the forecast method applied here. The forecast algorithm calculates or predicts a future value by using existing values. The predicted value is a y-value for a given x-value. The known values are existing x-values and y-values, and the new value is predicted by using linear regression.

The syntax is as follows

FORECAST(x, known\_y's, known\_x's)

X is the data point for which we want to predict a value.

Known\_y's is the dependent array or range of data (rainfall or temperature).

Known\_x's is the independent array or range of data (time).

The equation for FORECAST is  $a+bx$ , where:

$$a = \bar{y} - b\bar{x} \quad \text{and} \quad b = \frac{\sum (x - \bar{x})(y - \bar{y})}{\sum (x - \bar{x})^2}$$

and where x and y are the sample means AVERAGE(known\_x's) and AVERAGE(known\_y's).

### 3.2. WRF Model configuration

The Advanced Research WRF version 3.9.1 model simulation was used in this study to downscale the ERA-Interim (European Centre for Medium Range Weather Forecasting ReAnalysis) data over the Indian Monsoon region. The model is configured with two-way nested domains (18 km and 9-km horizontal resolutions), 51 vertical levels and model top at 10 hPa level. The first domain of the model extends over the whole Indian monsoon region (24.8516°E to 115.148°E and 22.1127°S to 46.7629°N) with 18-km horizontal grid resolution while the second domain (6-km resolution) spread over the Indian sub-continent region (56.3838°E to 98.5722°E and 22.1127°S to 46.7629°N).

The first domain of the model extends over the whole Indian monsoon region (28°E to 112°E and 20°S to 45°N) with 18-km horizontal grid resolution while the second domain (9-km resolution) covers the Indian sub-continent region.

The dimensions of the WRF model domains considered are listed below:

Domain -1 (18-km) extends from Longitude from 24.8516 E to 115.148E and Latitudes from 22.1127S to 46.7629 N

Formatted: Line spacing: 1.5 lines

Formatted: Font: 10 pt, Not Bold

Formatted: Font: 10 pt, Not Bold

Formatted: Font: (Default) Times New Roman, 10 pt

Formatted: Font: 10 pt, Not Bold

Formatted: Font: 10 pt

Formatted: Font: 10 pt, Not Bold

Formatted: Font: 10 pt

Formatted: Font: 10 pt, Not Bold

Formatted: Font: 10 pt

Formatted: Font: 10 pt, Not Bold

Formatted: Font: 10 pt

Formatted: Font: 10 pt, Not Bold

Formatted: Font: 10 pt

Formatted: Font: 10 pt, Not Bold

Formatted: Font: 10 pt

Formatted: Font: 10 pt, Not Bold

Formatted: Font: 10 pt

Formatted: Font: 10 pt, Not Bold

Formatted: Font: 10 pt, Not Bold

Formatted: Font: 10 pt, Not Bold

Formatted: Justified, Indent: First line: 0.5", Don't add space between paragraphs of the same style, Line spacing: 1.5 lines, Pattern: Clear

Formatted: Font: 10 pt, Not Bold

Formatted: Font: 10 pt, Not Bold

Domain 2 (6 km) extends from Longitude from 56.3838E to 98.5722E and Latitude from 3.86047 S to 38.2874 N

The initial and boundary conditions supplied to WRF model are obtained from ERA-Interim 6-hourly data. Model physics used in the study for boundary layer processes is Yonsei University's non-local diffusion scheme (Hong et al., 2006), the Kain-Fritsch scheme for cumulus convection (Kain and Fritsch, 1993), Thomson scheme for microphysical processes, the Noah land surface scheme (Chen and Dudhia, 2001) for surface processes, Rapid Radiation Transfer Model (RRTM) for long-wave radiation (Mlawer et al., 1997), and the Dudhia (1989) scheme for short-wave radiation. The physics options configured in this study are adopted based on the previous studies of heavy rainfall and Monsoon studies over Indian region (Srinivas et al., 2013, Madala et al., 2016, Priyanka Ghosh et al., 2016; Srinivas et al., 2018).

For the present study, the WRF model is initialized on daily basis at 12 UTC using ECMWF ERA interim data and integrated for a ~~complete~~ 36-hour period using the continuous re-initialization method (Lo et al., 2008 and Langodan, et al., 2016; Viswanadhapalli et al., 2017). Keeping the first 12-hours as model spin-up time, the remaining 24-hour daily simulations of the model are merged to get the climate data during 1980-2016. To find out the skill of the model, the downscaled simulations of WRF model are validated at six IMD surface meteorological stations. The statistical skill scores such as bias, mean error (ME) and root mean square error (RMS) were computed for ~~both~~ the simulated temperature ~~and against the~~ observed temperature data of IMD.

## 4. Results and Discussion:

### 4.1. Trend in annual and seasonal temperature

~~From Table 1, it is evident that~~ Tables 1 & 2 show the results of statistical tests (Mann-Kendall and linear regression Student's t) carried out on the temperature and precipitation data respectively. From Table 1, it is evident that ~~There is an increasing trend at different confidence levels in annual and seasonal temperatures of all the six stations (Pahalgam, Gulmarg, Kokarnag, Srinagar, Kupwara and Qazigund), located in different topographical settings. Higher value of statistical significance between Mann-Kendall and linear regression test results is considered here. In Table 4, shows the these result of statistical tests (Mann-Kendall and linear regression Student's t) results are provided in detail along with Student's t test results for comparison. In this study, higher values of statistical significance between test results are taken into consideration.~~ It is to be noted here that the ~~latter~~ Student's t-test is not recommended in general for trend analyses as it could not identify properly odd data points. During 1980-

2016<sup>9</sup>, Pahalgam and Gulmarg, located at higher elevations of about 2500m amsl (above mean sea level), registered an increase in average annual temperature by 1.13°C and 1.04°C respectively at the confidence level of S=99% (Fig. 2a). “S in S=99%” indicates statistically significant. It is to be noted that hereafter it will not be mentioned explicitly about the period 1980-2016<sup>9</sup> and the statistical significance of derived values. All the results are subjected to statistical tests with confidence level of statistical significance at S=99% unless otherwise mentioned explicitly. Further, values denoting “less than” refer to S=99% and the confidence levels corresponding to given values are provided within closed brackets. Kokarnag and Kupwara, located at the heights of about 1800-2000m amsl, showed an increase of 0.9°C and 1°C respectively at S=99% (Fig. 2a). However, Srinagar and Qazigund, located at the heights of about 1700m-1600m amsl, exhibited an increase of 0.65°C and 0.44°C respectively at S=99% (Fig. 2a).

The analysis of maximum and minimum temperatures (Table 1 and Fig. 2b) for these six stations reveals higher increase in maximum temperature. At S=99%, Pahalgam and Kupwara recorded the highest rise of ~1.3°C followed by Kokarnag (1.2°C), Srinagar (1.1°C) and Qazigund (0.6°C). The exception is that Gulmarg (being a hilly station) shows less than 0.6°C in maximum temperature (0.6°C at S=90%) and higher increase of 1.21°C in minimum temperature. The minimum temperature shows lowest increase of 0.3°C at Srinagar (Fig. 2c). Analyses of seasonal mean minimum and maximum temperatures in the valley reveal higher increase in maximum temperature in winter and spring seasons. Among four stations (Gulmarg, Pahalgam, Kokarnag and Kupwara), the mean winter temperature of Gulmarg indicates an increase of less than 1°C (1°C at S=95%) while Pahalgam, Kokarnag and Kupwara shows an increase of 0.9°C and less than 0.9°C (0.9°C at S=90%) respectively (Table 1 and Fig. 2d). On the contrary, Qazigund and Srinagar showed a slight increase of less than 0.4°C and 0.5°C (S=90%) respectively. Mean spring temperature shows higher rise comparing to other seasons for all the stations. While Gulmarg shows an increase of less than 1.4°C (S=95%), Pahalgam, Kupwara and Kokarnag reveals an increase of 1.3°C and Srinagar and Qazigund display an increase of less than 1°C and 0.6°C (S=95%) respectively as shown in Table 1 and Fig. 2e. In summer, the temperature rise for Pahalgam is about less than 0.6°C (S=90%) and for Kokarnag and Gulmarg, it is about 0.4°C (insignificant level (NS), Table 1). Kupwara, Qazigund and Srinagar reveal an increase of less than 0.3°C, 0.2°C and 0.1°C (S=90%) respectively (Fig. 2f). In Autumn, Gulmarg shows an increase of 0.9°C while Pahalgam and Kupwara shows less than 0.6°C (S=95%). On the contrary, Kokarnag and Qazigund shows less than 0.4°C (S=90%) but Srinagar shows no significant increase (Fig. 2g and Table 1). and Table 1).

## 4.2. Trend in annual and seasonal precipitation

The annual precipitation pattern of the valley is comparable to that of temperature with higher decrease observed at the upper elevation stations of Gulmarg and Pahalgam. These two stations show an average decrease in annual precipitation at S=95% and S=90% respectively (Fig. 3a and Table 2). Similar to temperature, Table 2 provides in detail the test results of Mann-Kendall, linear regression and Student's t. Kokarnag and Kupwara

show decrease at S=90%. The lower elevated stations, Qazigund and Srinagar, exhibit decrease at S=95% (Fig. 3a). The analysis of winter precipitation reveals maximum decrease at Gulmarg and Kokarnag followed by Kupwara and Pahalgam at S=90%. On the other hand, Srinagar and Qazigund display an average insignificant (NS) decrease (Table 2 and Fig. 3b) while the spring season precipitation exhibits decreasing trend at S=95% at Qazigund and Pahalgam (Fig. 3c). Srinagar, Gulmarg and Kokarnag show decrease at S=99%, S=99% and S=95% respectively. The lowest decreasing trend of 42mm precipitation during 1980-2016 was observed at Kupwara at S=99% (Table 2).

During the summer months, precipitation follows the same decreasing trend but not at significant level (NS) for Gulmarg, Kupwara, Kokarnag, Pahalgam and Srinagar (Fig. 3d, and Table 2). In addition, Qazigund shows no trend in summer precipitation. The autumn precipitation at Pahalgam, Kupwara, Kokarnag, Srinagar, Gulmarg and Qazigund shows an average decrease at insignificant level (NS) (Fig. 3e and Table 2). Cumulative test was used to determine the change point of trend in the annual and seasonal variations of temperature and precipitation. The results reveal that the year 1995 is identified as the year of abrupt increase (change point) in temperature of the valley (Fig. 4a) and the same is identified as the year of abrupt decrease for precipitation (Fig. 4b).

### 4.3. North Atlantic Oscillation (NAO) index and winter climatic fluctuations

Along with the trend analyses of temperature and precipitation, the present study also investigated the teleconnection between the activity of NAO (NAO index) and temperature and precipitation over the Kashmir valley, particularly during the northern winter season (December - March). The results indicated that NAO has negative correlations (-0.54) with the winter precipitation, suggesting negative while the winter temperature shows positive correlations of 0.54 and of (0.68) between with the NAO and the winter temperature, and precipitation respectively (Fig. 4c). This correlation study suggests that winter precipitation and temperature has some association with the winter NAO index. Where higher precipitation over Kashmir is associated with the positive phase of NAO. This would indicate that positive phase of NAO is associated with more precipitation. Further the abrupt change in interestingly, similar to the observed temperature and precipitation in 1995, changes in Kashmir in mid-nineties, has clear shows association with abrupt variation in the NAO index from the same year is also identified in 1995. To test whether the trends in temperatures and precipitation are forced by the NAO, regression analysis was performed for temperatures and precipitation data during winter (December- March) which is depicted in the Figs. 4e and f. From the results it is clear that the observed trends in winter and spring temperature and precipitation would have been influenced by NAO.

The observed annual and seasonal variation of temperature at all the six stations (Gulmarg, Pahalgam, Kokarnag, Kupwara, Qazigund and Srinagar) is correlated with WRF downscaled simulations. The simulations show correlation of 0.66, 0.67, 0.72, 0.62, 0.79 and 0.47 for Srinagar, Gulmarg, Kokarnag, Kupwara, Pahalgam and Qazigund respectively. The annual mean simulated temperature shows very good correlation (0.85) with the observations. [Figure 5 shows the annual and seasonal correlation of temperature trends between with the WRF model \(location of Kokarnag is considered for WRF data\) and observations. \(Fig. 5\). Gulmarg, Kokarnag and Pahalgam show higher correlation with the simulation comparing to Qazigund, Kupwara and Srinagar.](#) However, the root mean square error (RMSE) analysis shows that model simulations [do](#) slightly underestimate the observed values with an average value of  $-0.43^{\circ}\text{C}$ . [Similar to Figure 5, Figure 6 shows the comparison between the WRF model and observed precipitation. Even though the trend is similar, WRF model severely underestimates rainfall amount. This issue needs to be addressed in our near future research studies.](#)

#### 4.4. Discussion

The Himalayan mountain system is quite sensitive to global climatic variations as the hydrology of the region is mainly dominated by snow and glaciers, making it one of the ideal sites for early detection of global warming (Solomon et al., 2007; Kohler and Maselli 2009). Various reports claim that in the Himalayas significant warming [had](#) occurred in the last century (Fowler and Archer, 2006; Bhutiyani et al., 2007). Shrestha et al. (1999) analysed surface temperature at 49 stations located across the Nepal Himalayas and the results indicate warming trends in the range of  $0.06$  to  $0.12^{\circ}\text{C}$  per year. The observations of the present study are in agreement with the studies carried out by Shrestha et al. (1999), Archer and Fowler (2004) and Butiyani (2007). In the present study, it is observed that the rise in temperature is larger at higher altitude stations of Pahalgam ( $1.13^{\circ}\text{C}$ ) and Gulmarg ( $1.04^{\circ}\text{C}$ ) whereas Kokarnag, Kupwara, Srinagar and Qazigund recorded a rise of  $0.9^{\circ}\text{C}$ ,  $0.99^{\circ}\text{C}$ ,  $0.04^{\circ}\text{C}$ , and  $0.10^{\circ}\text{C}$  respectively with an average rise of  $0.8^{\circ}\text{C}$  during 1980-2016. Liu et al. (2009) and Liu and Chen (2000) also reported higher warming trends at higher altitudes in the Himalayan regions. Wiltshire (2013) warned, using a climate change model, that the impacts of climate change in the future will be intense at higher elevations and in regions with complex topography.

The noteworthy observation in the present study is that drastic and significant increase in the temperature (change point) started in 1995. The El Nino of 1998 has been recorded in the history of the earth as one of the strongest El-ninos that brought worldwide increase in temperature (Epstein et al., 1998). In contrast, during the 1992 El-nino period, the decrease in temperature throughout the northern hemisphere is ascribed to the natural phenomena of volcanic eruption occurred on the Mt Pinatubo (Swanson et al., 2009; IPCC, 2013). This event interrupted the direct sunlight to reach on the surface of the earth for about two months.

Studies of trends in seasonal mean temperature in many regions across the Himalayas indicate higher warming trends in winter and spring months (Shrestha et al., 1999; Archer and Fowler, 2004; Butiyani, 2009). The seasonal difference found in the present study is consistent with other studies carried out for the Himalayas (Archer and Fowler, 2004; Sheikh et al., 2009 and Roe et al., 2003), Lancang Valley, China (Yunling and Yiping, 2005), Tibet (Liu and Chen, 2000) and the Swiss Alps (Beniston et al., 2010), where almost all stations recorded higher increase in the winter and spring temperatures comparing to autumn and summer temperatures. Recent studies found that reducing snows and shrinking glaciers may also be one of the contributing factors for the observed higher warming, because reduction in snow and glacier can change the surface albedo of the region, which in turn can increase the surface air temperature (Kulkarni et al., 2002; Groisman et al., 1994). Romshoo et al. (2015) and Murtaza and Romshoo (2016) have reported that reduction of snow and glacier cover in the Kashmir regions of the Himalayas during the recent decades could be one of the reasons of occurrence of higher warming particularly on the higher elevated stations of Gulmarg and Pahalgam.

In the Himalayan mountain system, contrasting trends have been noted in precipitation over the recent decades. IPCC (2001), Borgaonkar et al. (2001), Shrestha et al. (2000), and Archer and Fowler (2004) observed increasing precipitation patterns over the Himalayas while Mooley and Parthasarathy (1983) and Kumar and Jain (2009) reported large-scale decadal variation with increasing and decreasing precipitation periods. The results of the present study indicate that decrease in annual precipitation is slightly insignificant at all the six stations except the spring season. Increasing trend in temperature can trigger large-scale energy exchanges that become more intricate as complex topography alters the precipitation type and intensity in many ways. Climate model simulations (Zarenistana et al. 2014; Rashid et al. 2015) and empirical evidence (Vose et al. 2005; Romshoo et al., 2015) also confirm that increasing temperature results in increased water vapour leading to more intense precipitation events even when the total annual precipitation reduces slightly. Increase in temperature therefore increases the risks of both floods and droughts. For example, the disaster flood event of September 2014 occurred in the Kashmir valley due to high frequency and high intense precipitation.

The North Atlantic Oscillation (NAO) is the strongest weather phenomena that occur in the Northern hemisphere due to the difference of atmospheric pressure at sea level between the Iceland low and the Azores high. It controls the strength and direction of westerly winds across the northern hemisphere. Surface temperatures have increased in the Northern Hemisphere in the past few decades (Mann et al., 1999; Jones et al., 2001), and the rate of warming has been especially high ( $\sim 0.15^{\circ}\text{C decade}^{-1}$ ) in the past 40 years (Folland et al., 2001; Hansen et al., 2001). NAO causes substantial fluctuations in the climate of the Himalayas (Hurrell, 1997; Syed et al., 2006; Archer and Fowler, 2004). Several workers found a strong connection between the NAO and temperature and precipitation in the north-western Himalayas (Archer and Fowler, 2004; Bhutiyani et al., 2007; Sharif et al., 2012; Iqbal and Kashif, 2013). A substantial fraction of the most recent warming is linked to the behaviour of the NAO (Hurrell, 1997; Thompson et al., 2003). The climate of the Kashmir Himalayas is influenced by the western disturbances particularly in winter and spring seasons. Figs. 4c & 4d show correlation between the winter NAO and winter

temperature and precipitation over the Kashmir region. Negative correlation (-0.54) exists between winter temperature and winter NAO index and positive correlation (0.68) for the precipitation. Linear regression analysis was used to determine whether the variation in temperature and precipitation during the winter months (December–March) is forced by NAO. It is found that considerable variation in winter precipitation/temperature may be forced by winter NAO. The weakening effect of NAO particularly after 1995 has decreased the winter precipitation and increased winter temperature in the valley. Similarly, Bhutiya et al. (2009) and Dimri and Dash (2012) also detected a statistically substantial decreasing trend in the precipitation pattern and identified considerable decrease in winter precipitation which they related to weakening of NAO index. However, detailed mechanism involved in these variations requires thorough investigation.

The comparison of WRF with the observed stations data shows a significantly strong correlation of 0.85. It is also found that the higher elevated stations show higher correlation than the lower elevated stations of Srinagar and Kupwara; however, good correlation could result if more precise terrain information is incorporated in the WRF model. Various researchers (e.g., Kain and Fritsch, 1990, 1993; Kain, 2004) also found good correlation between observed and WRF simulated rainfall events. In conjunction with large-scale features such as the NAO and ENSO, it can result in large scale variability in the climate of this region (Ogura and Yoshizaku, 1988). Further, incorporation of mesoscale teleconnections and their associations in the WRF model can further help in understanding large-scale weather forecasting particularly in this region.

#### **4.5.3. Physical mechanisms of climate and weather of Jammu & Kashmir**

Large-scale spatial and temporal variations in the meridional winds could be due to the passage of planetary-scale Rossby waves (RW) in the atmospheric winds. When RWs break in the upper troposphere, it could lead to vertical transport of atmospheric air between the upper troposphere and lower stratosphere and an irreversible horizontal transport of air mass between the subtropics and extra tropics (McIntyre and Palmer, 1983). Rossby waves have the characteristic of remaining coherent over many days and propagating long distances of the order synoptic to planetary scales leading to tele-connection of remote atmospheres of global extent. It is clear from the studies by Chang and Yu (1999) that during northern winter months of December–January–February, Rossby wave packets can be most coherent over a large distance of from the northern Africa to the Pacific through the southern Asia. There are reports on extreme weather events connected to Rossby waves of synoptic to planetary scales in the upper troposphere (Screen and Simmonds, 2014). In the northern parts of India, there is increasing trend in heavy rainfall events, particularly over the Himachal Pradesh, Uttarakhand and Jammu and Kashmir (Sinha Ray and Srivastava, 2000; Nibanupudi et al., 2015). Long-scale Rossby waves can lead to the generation of convergence and divergence in the upper troposphere that in turn can affect surface weather parameters like precipitation through

generation of instabilities in the atmospheric air associated with convergence and divergence (Niranjankumar et al., 2016).

Using observations and MERRA (Modern-Era Retrospective Analysis for Research and Applications reanalysis data; <http://gmao.gsfc.nasa.gov/research/merra/>), Rienecker et al. (2011) showed a strong correlation between 6-10 day periodic oscillations in the upper tropospheric winds associated with Rossby waves and surface weather parameters like atmospheric pressure, winds, temperature, relative humidity and rainfall during a severe weather event observed at the Indian extratropical station, Nainital (29.45° N, 79.5° E), during November–December 2011. Further they noted that when the upper troposphere shows divergence, the lower troposphere shows convergence and as a result more moisture gets accumulated there leading to enhancement of relative humidity and hence precipitation. It was asserted that Rossby waves in the upper troposphere can lead to surface weather related events through the action of convergence or divergence in the atmospheric air. It is to be noted that a passing Rossby wave can cause fluctuations in divergence and convergence in the atmosphere at periodicities (typically 6-10 days, 12-20 days) corresponding to the Rossby waves at a particular site.

It was reported that Rossby waves account for more than 30% of monthly mean precipitation and more than 60% of surface temperature over many extra tropical regions and influence short term climatic extremes (Schubert et al., 2011). Planetary waves affecting weather events severely for long duration of the order of months have been reported by many researchers (Petoukhov et al., 2013; Screen and Simmonds, 2014; and Coumou et al., 2014). Screen and Simmonds (2014) found that in the mid latitude regions there is a strong association between enhanced Rossby wave activity, surface temperature and extreme precipitation events during 1979–2012. Since slowly propagating Rossby waves can influence weather at a particular site for long periods lasting more than few weeks, one can see the imprint of climatic variations of Rossby waves in weather events from monthly mean atmospheric parameters.

To understand the present observation of different precipitation characteristics at all the six mentioned stations over the study area, we compared the monthly variation of PV in the upper troposphere with precipitations at all these stations. Potential vorticity at 350K potential temperature (PT) surface is identified as a valuable information for investigating the activity of Rossby waves as its breakage (can be identified through reversal of gradient in PV) at this level can lead to exchange of air at the boundary between the tropics and extra tropics (Homeyer and Bowman, 2013). Similarly PV at 200 hPa pressure surface (PS) is more appropriate for identifying Rossby wave breaking in the subtropical regions (Garfinkel and Waugh, 2014).

Since the Srinagar city, among the six stations, is on the plain land with comparatively less topographical features located in the centre of the Kashmir valley, precipitation here associated with western disturbances is under the direct influence of planetary-scale Rossby waves. Accordingly, correlation between PV at the 350 K PT (located near the core of the subtropical jet, Homeyer and Bowman, 2013) and 200 hPa pressure surfaces and precipitation is found significant and the correlation becomes weaker for the other stations located at higher altitudes

due to significant orographic influences. As a result, one can see that PV (ERA-Interim data, Dee et al., 2011) in the upper troposphere varies in accordance with precipitation, which is clearly depicted in Fig. 76, during the entire years of 1984, 1987, 1988, 1990, 1993, 1994, 1995, 1996, 1999, 2006 and 2009. One can observe that sometimes PV at 350 K PT surface and at other times at 200 mbhPa pressure surface follows precipitation. This would be due to the influence of Rossby waves generated due to baroclinic and barotropic instabilities respectively. Particularly, the correlation between PV (sometimes either one or both) and precipitation is significantly positive during the Indian summer monsoon months of June-September of all the years from 1980 to 2009 except 1983, 1985, 1989, 2000-2005 and 2009. At present it is not known why this relation became weak during 1999-2010.

For Kokarnag (Fig. 78), topography similar to Srinagar but located in the vicinity of high mountains, the relation between PV and precipitation particularly during the Indian summer-monsoon-period is almost similar to that of Srinagar during 1983, 1985, 1989, 1991, 1998, 1999, 2000-2005, but in 2009 it became poor. This deterioration of the link between PV and rainfall over Kokarnag particularly during 1999-2010 is really due to the effect of climate change, which is similar to what was observed for Srinagar. It is intriguing that why this relation became poor during the years of 1999-2010. In the northern Kashmir region of Kupwara (Fig. 98), msl higher by ~1 km than Srinagar, the relation between PV and precipitation is good in the years 1982-1983, 1985-1988, 1990-1994, 1995-1996, 1999, and 2006. Similar to Srinagar and Kokarnag, Kupwara also shows a poor link during 1999-2010. Particularly during the summer monsoon period, the relation is good in all the years except 1989, 1998, 2000-2005, and 2009. One interesting observation is that 1983, 1985 and 1991 shows better correlation for Kupwara than Srinagar and Kokarnag. Since Kupwara is located near elevated Greater Himalayan mountain range, Rossby waves associated with topography would have contributed to the good correlation between PV and precipitation here, which is not the case for Srinagar and Kokarnag. In the case of Pahalgam (Fig. 910), located near the Greater Himalayas, generally the link is good in almost all the years 1980-2016 but with a difference that sometimes both the PVs and on other times only either of them follow precipitation during some months. Particularly during summer monsoon months, similar to Kupwara, these years 1989, 2000-2003, 2005 and 2009 show poor correlation. From the present observations, it can be easily ascertained that stations located near the Greater Himalayas show similar characteristics influenced by topography-associated Rossby waves.

For the hilly station of Qazigund (Fig. 119), located in the south Kashmir region (~3 km height) near the foothills of Pir Panjal mountain range, the relationship is better than that observed over the northern station Kupwara. For example, in 1988, the relation is much better over Qazigund than Kupwara. However the opposite is true in 1987. Interestingly, in 1985, both Kupwara and Qazigund show similar variation in PV and precipitation. This may be due to the effect of the nature of equatorward propagation of Rossby waves from mid latitudes. In 1995, 1997 and 1998, PV and precipitation follow similar time variation for both Kupwara and Qazigund except for three months of January-March during which precipitation over Qazigund but not Kupwara follows PV. Interestingly, in the whole year of 1999, precipitation at both the stations, Kupwara and Qazigund, follows exceedingly well with PV; however in 1998, only Qazigund but not Kupwara shows good relation. In 2009, precipitation does not follow

PV for both the stations. Interestingly in all the months of 2006, PV follows well with precipitation for both Kupwara and Qazigund. However in September, Kupwara but not Qazigund shows good relation. In 2004, only PV at constant potential temperature surface (350K) follows well with precipitation for both the stations. For the summer monsoon period of June-September, these years do not show good correlation, namely, 1983, 1985, 1989, 1990, 2000-2003, 2005, 2007-2009, which is almost similar to Srinagar and Kokarnag.

In the case of Gulmarg (Fig. 124), PV and precipitation follow each other well in the years of 1988, 1993, 1994 and 1995. In 1996, during the Indian summer monsoon period of June-September, only PV at constant potential temperature surface follows precipitation. Overall, during the summer monsoon period, the relationship between PV and precipitation is appreciable for all the years except for 1983, 1989, 1990, 1999 and 2000-2009, which is almost similar to Kupwara and Pahalgam. It may be noted that these stations are located near comparatively elevated mountains and hence topographically induced Rossby waves could have contributed to this good relation. From the observations of these stations, one can come to the conclusion easily that high altitude mountains affect the precipitation characteristics through topography generated Rossby waves. The interesting finding here is that irrespective of the different heights of mountains, all the stations show that during 1999-2010 the correlation between upper tropospheric PV and rainfall became poor, indicating that some unknown new atmospheric dynamical concepts would have played significant role in disturbing the precipitation characteristics significantly over the western Himalayan region. This issue needs to be addressed in the near future by invoking suitable theoretical models so that predictability of extreme weather events can be improved in the mountainous Himalaya.

During 2011-2016 (Fig. 132), it may be observed that for Gulmarg the linkage between potential vorticities and precipitation is in general good for all these years except around July 2012, July-December 2013 and 2015. It is interesting to note here that during the historical flood event of September 2014, the potential vorticities and precipitation follow each other but in the preceding and following years of 2013 and 2015 the linkage between PV and precipitation is rather poor as noted earlier. Similarly, all the other stations (Srinagar, Pahalgam, Kokarnag, Kupwara, and Qazigund) also show that the link between PV and precipitation is good around September 2014. This would indicate clearly that the extreme weather event during September 2014 over the area occurred because of the intense large-scale Rossby wave activity and not because of any localized adverse atmospheric thermodynamical conditions like enhanced local convection etc. In Srinagar, most of the times PV and precipitation follow each other very well as observed during January 2011-June 2012, January-July of 2013 & 2014, whole 2015 and 2016. In Qazigund, this relation is good only during January-July and September-October 2014, during the entire 2015 and 2016 (similar to Srinagar). For Kupwara, PV follows precipitation well during whole of 2011, January-July 2012, January-May 2013, January-November 2014, whole of 2015 and 2016. In the case of Kokarnag, good relation is observed during March-August 2012, January-June 2013 and 2014, around September 2014. In contrast, the relationship is very poor in the entire years of 2015 and 2016. Pahalgam interestingly shows good correlation between PV and precipitation during the whole years of 2011 and 2012. In 2013, 2014, 2015 and 2016, it is good only during January-June in addition to exceptionally good near September 2014.

Finally, it may be observed that the ERA-interim reanalysis data of meridional wind velocity (12UT) at ~3 km altitude above the mean seal level show alternating positive (southerly) and negative values, resembling the atmospheric Rossby waves in the sub tropical region during 1-6 September 2014 (Fig. 143). The meridional winds associated with Rossby waves could be easily noted to have their extensions in both the Arabian Sea and Bay of Bengal, indicating that water vapour from both the regions was attracted towards the Jammu and Kashmir, India region as the converging point of Rossby waves was located near this region. It may be easily noticed that the waves got strengthened on 4<sup>th</sup> and weakened on 5<sup>th</sup> and ultimately dissipated on 6<sup>th</sup> September. This dissipation of Rossby waves led to the dumping of the attracted water vapour over this region leading to the historical-record heavy-flooding during this period. This is one clear example of how synoptic scale Rossby waves can reorganize water vapour over large scale and lead to extreme rainfall event. It is well known that subtropical westerly jet is one of many important sources of Rossby waves in the mid to tropical latitudes. If the subtropical jet drifts climatically northward then the surface weather events associated with them also will drift similarly which will lead to unusual weather changes climatically.

Interestingly from the published reports, it can be found that there is a close association between changes in Rossby wave breaking events and climatic variations and variations in the stratospheric dynamics (Barnes and Polvani 2013; Lu et al. 2014). Climatic meridional shift, which is in response to the enhanced polar vortex and upper-tropospheric baroclinicity arising due to global warming, of the tropospheric jet has been successfully linked to climatic changes in Rossby wave breaking events caused by baroclinic instabilities (Wittman et al., 2007; Kunz et al., 2009; Rivière, 2011; Wilcox et al., 2012). The climatic increase in the tropospheric warming arising due to baroclinic forcing of Rossby waves is more prominent in the mid-latitudes than in the tropical regions (Allen et al., 2012; Tandon et al., 2013). This mid-latitude warming plays an important role in driving the poleward jet shift responding to climate change (Ceppi et al., 2014). It is to be remembered that the combined action of tropospheric baroclinic forcing (warming) and stratospheric polarvortex can gradually move the subtropical jet from about 27° to 54° (Garfinkel and Waugh, 2014). Using Global circulation models (GCM), linear wave theory predicts that in response to increased greenhouse gas (GHG) forcing, mid-latitude eddy-driven jets, arising due to strong coupling between synoptic scale eddy activity and jet streams in both the hemispheres, will be climatically shifted poleward (Fourth report of Intergovernmental Panel on Climate Change (IV-IPCC), Meehl et al., 2007). However, mid-latitude Rossby waves and the associated wave dissipation in the subtropical region are predicted to move climatically equatorward due to the spherical geometry of the Earth (Hoskins et al., 1977; Edmon et al., 1980). This propagation of location of wave breaking towards the equator will have climatic impact on the proper relation between upper troposphere PV variations associated with Rossby waves and the associated surface weather parameters in the subtropical latitude regions. This may be one of the reasons that during 1999-2010, the relation between PV and precipitation became poor as observed in the present study.

Regarding surface temperature, except for its linear long term trend, there is no clear evidence of strong link between variations in the upper tropospheric potential vorticities and surface temperature for all the six stations mentioned. It seems that climatic variations in the upper tropospheric vorticities have significantly less influence on surface temperature variations.

## 5. Conclusions

Studies of climatic change in the surface temperature and precipitation over the Jammu and Kashmir, India region of the western Himalayas are carried out for a period of 37 years during 1980-2016. Analyses of the observations reveal an increase in the annual temperature by 0.8°C. Higher increase in temperature is noted for stations located at higher altitudes and that is accompanied ~~by with~~ an insignificant decrease in annual precipitation. Long-term variation of winter temperature and precipitation has good correlation with winter NAO index. Additionally, WRF model simulations show good correlation of 0.85 with the observed data. It is found that in the recent decades, precipitation associated with both the monsoon and western disturbances has been decreasing significantly. While the monsoon deficiency is associated with decreasing difference in surface temperature between the Indian landmass and nearby Indian ~~O~~cean, the deficiency associated with western disturbances during winter is due to the climatic northward displacement of subtropical jet. This subtropical jet wind helps to drag moisture associated with disturbances to the Himalayan region. Regarding historical extreme weather event associated with September 2014 floods in Jammu and Kashmir, it is found that breaking of intense Rossby wave activity over Kashmir played an important role as the wave could drag lots of water vapor from both the Bay of Bengal and Arabian Sea and dump them here through its breaking during the first week of September, 2014, leading to the extreme rainfall event measuring more than 620 mm in some parts of the South Kashmir.

## Acknowledgements:

Thanks are due to the India Meteorological Department, Pune, India, ERA-Interim reanalyses and WRF model simulation teams for the data of meteorological parameters employed in the present work. Prof. Shakil Romshoo and Dr. Sumaira Zaz gratefully acknowledge the support of the Department of Science and Technology (DST), Government of India under the research project titled “Himalayan Cryosphere: Science and Society”. Dr. T. K. Ramkumar and Dr. V. Yesubabu acknowledge the support of Dept. of Space, Govt. of India. The authors express gratitude to the two anonymous reviewers and Editor for their valuable comments and suggestions on the earlier version of the manuscript that has greatly improved its content and structure.

## References:

Ghasemi, A. R., Changes and trends in maximum, minimum and mean temperature series in Iran, DOI: 10.1002/asl2.569, Atmos. Sci. Let. 16: 366–372 (2015).

Formatted: Font: 10 pt, Not Bold, Not Italic

Formatted: Font: 10 pt, Not Bold, Not Italic

Formatted: Font: 10 pt, Not Bold

Allen, R. J., S. C. Sherwood, J. R. Norris, and C. S. Zender, (2012): Recent Northern Hemisphere tropical expansion primarily driven by black carbon and tropospheric ozone. *Nature*, 485, 350–354, doi:10.1038/nature11097.

Archer, D. R. and H. J. Fowler, (2004): Spatial and temporal variations in precipitation in the Upper Indus Basin, global teleconnections and hydrological implications. *Journal of Hydrology and Earth System Science* 8: 47–61.

Barnes, E. A., and L. Polvani, (2013): Response of the midlatitude jets, and of their variability, to increased greenhouse gases in the CMIP5 models. *J. Climate*, 26, 7117–7135, doi:10.1175/JCLI-D-12-00536.1.

Bartels, J., D. Peters, and G. Schmitz, (1998): Climatological Ertel's potential vorticity flux and mean meridional circulation in the extratropical troposphere–lower stratosphere. *Ann. Geophys.*, 16, 250–265.

Beniston, M., (2010): Impact of climatic change on water and associated economic activities in the Swiss Alps. *Journal of Hydrology*. p1-6

Bhutiya, M. R., Kale, V. S. and N. J. Pawar. (2007): Long-term trends in maximum, minimum and mean annual air temperatures across the northwestern Himalaya during the 20th century. *Climatic Change* 85: 159–177.

Bhutiya, M. R., Kale, V. S. and N. J. Pawar. (2009): Climate change and the precipitation variations in the northwestern Himalaya: 1866–2006. *International Journal of Climatology* 30(4): 535–548

Bhutiya, M. R., Kale, V. S. and N. J. Pawar. (2010): Climate change and the precipitation variations in the northwestern Himalaya: 1866–2006. *International Journal of Climatology* 30: 535–548.

Bolch, T., Kulkarni, A., A. Kaabet, A. L., (2012): The state and fate of Himalayan glaciers. *Science*, 336: 310–314.

Borgaonkar, H. P. and G. B. Pant,(2001): Long-term climate variability over monsoon Asia as revealed by some proxy sources. *Mausam*, 52: 9–22

Ceppi, P., M. D. Zelinka, and D. L. Hartmann, (2014): The response of the southern hemispheric eddy-driven jet to future changes in shortwave radiation in CMIP5. *Geophys. Res. Lett.*, 41, 3244–3250, doi:10.1002/2014GL060043.

Chang, E. K. M. and D. B. Yu, (1999): Characteristics of Wave Packets in the Upper Troposphere. Part I: Northern Hemisphere Winter, *J. Atmos. Sci.*, 56, 1708–1728.

Chen J., and A. K. Gupta, (2012): *Parametric Statistical Change Point Analysis*. Birkhauser: Boston, MA; 240 pp.

Collins, D., (2008): Climatic warming, glacier recession and runoff from Alpine basins after the Little Ice Age maximum. *Annals of Glaciology* 48(1):119–124.

Coumou, D., Petoukhov, V., Rahmstorf, S., Petri, S., and H. J. Schellnhuber, (2014): Quasi-resonant circulation regimes and hemispheric synchronization of extreme weather in boreal summer, *P. Natl. Acad. Sci. USA*, 111, 12331–12336, doi:10.1073/pnas.1412797111.

Dar, R. A., Romshoo, S. A., Chandra, R., and I. Ahmad, (2014): Tectono-geomorphic study of the 4 Karewa Basin of Kashmir Valley. *Journal of Asian Earth Sciences*, 92: 143–156.

Dee, D. P., and Coauthors, (2011): The ERA-Interim reanalysis: Configuration and performance of the data assimilation system. *Quart. J. Roy. Meteor. Soc.*, 137, 553–597, doi:10.1002/qj.828.

Dimri, A. P. and S. K. Dash, (2012): Winter time climatic trends in the western Himalayas, *Climate. Change*, (111): 775–800.

Edmon, H. J., B. J. Hoskins, and M. E. McIntyre, (1980): Eliassen-Palm cross sections for the troposphere. *J. Atmos. Sci.*, 37, 2600–2615.

Epstein P. R. et al., (1998): *Extreme Weather Events: The Health and Economic Consequences of the 1997/98 El Niño and La Niña*. Center for Health and the Global Environment, Harvard Medical School, Boston. Database available on website [<http://www.chge2.med.harvard.edu/enso/disease.html>]

Ertel, H., (1942): Ein neuer hydrodynamischer Wirbelsatz. *Meteor. Z.*, 59, 277–281.

Folland, C. K., Rayner, N. A., Brown, S. J., Smith, T. M., S. P. Shen, Parker, D. E., Macadam, I., Jones, P. D., Jones. Nicholls, RNN and D. M. H. Sexton,(2001): "Global temperature change and its uncertainties since 1861". *Geophysical Research Letters*, 28: 2621-2624. DOI:10.1029/2001GL012877

Gao P, Mu XM, Wang F, and R. Li,(2011): Changes in stream flow and sediment discharge and the response to human activities in the middle reaches of the Yellow River. *Hydrology and Earth System Sciences* 15: 1–10

Garfinkel, C. I., and D. W. Waugh, (2014): Tropospheric Rossby Wave Breaking and Variability of the Latitude of the Eddy-Driven Jet , *Journal of Climate*, 27, 7069-7085, DOI: 10.1175/JCLI-D-14-00081.1.

Ghasemi, A. R., (2015): Changes and trends in maximum, minimum and mean temperature series in Iran. *Atmospheric science letters*,16 :201-230.

Groisman, PavelYa, Thomas R. Karl, Richard W. Knight, Georgiy L. and Stenchikov,(1994): Changes of snow cover, temperature, and radiative heat balance over the Northern Hemisphere. *Journal of Climate*, 7:1633–1656.

Hansen, A. R., Nastrom, G. D. and F. D. Eaton,(2001): Seasonal variation of gravity wave activity at 5–20 km observed with VHF radar at White Sands Missile Range, New Mexico. *Journal of Geophysical Research* 106: doi: 10.1029/2001JD900137. issn: 0148-0227.

Hewitt, K., (2005): 'The Karakoram anomaly?Glacier expansion and the 'elevation effect,' Karakoram, Himalaya.' *Mountain Research and Development* 25(4): 332-340

Homeyer, C. R., and K. P. Bowman, (2013): Rossby Wave Breaking and Transport between the Tropics and Extratropics above the Subtropical Jet, *Journal of the Atmospheric Sciences*, 70, 607-626, DOI: 10.1175/JAS-D-12-0198.1.

Hoskins, B. J., A. J. Simmons, and D. G. Andrews, (1977): Energy dispersion in a barotropic atmosphere. *Quart. J. Roy. Meteor. Soc.*, 103, 553–567.

Hoskins, B. J., M. E. McIntyre, and A. W. Robertson, (1985): On the use and significance of isentropic potential vorticity maps. *Quart. J. Roy. Meteor. Soc.*, 111, 877–946.

Hurrell JW and H van Loon, (1997): Decadal variations in climate associated with the North Atlantic Oscillation, *Climatic Change*, 36, 301–326, *Research Letter*. 23, 665–668.

Immerzeel W, Van Beek LPH and Bierkens MFP, (2010): Climate Change Will affect the Asian Water Towers. *Science*.328, p1382-1385.

IPCC (2013). Climate Change 2013: The Physical Science Basis. Contribution of Working Group I to the Fifth Assessment Report of the Intergovernmental Panel on Climate Change. T.F. Stocker, D. Qin, G.-K. Plattner, M. Tignor, S.K. Allen, J. Boschung, A. Nauels, Y. Xia, V. Bex, P.M. Midgley (Eds.), Cambridge University Press, Cambridge, United Kingdom and New York, NY, USA, 1535 pp.

IPCC, (2001) Climate change(2001): Impacts, adaption and vulnerability. Contribution of Working Group II to the Third Assessment Report of the Intergovernmental Panel of ClimateChange, Intergovernmental Panel on Climate Change, Cambridge, U.K.

Iqbal MJ and Kashif I (2013): Influence of Icelandic Low pressure on winter precipitation variability over northern part of Indo-Pak Region *Arabian Journal of Geoscience* 6:543–548 DOI 10.1007/s12517-011-0355-y

Jones PD, TJ Osborn and KR Briffa,( 2001).The evolution of climate over the last millennium, *Science*, 292, 662–667

K. Niranjana Kumar, D. V. Phanikumar, T. B. M. J. Ouarda, M. Rajeevan, M. Naja, and K. K. Shukla, Modulation of surface meteorological parameters by extratropical planetary-scale Rossby waves, doi:10.5194/angeo-34-123-2016, *Ann. Geophys.*, 34, 123–132, 2016.

Kaul V and Qadri BA (1979) Seasons of Kashmir.*Geographic, Revision .India*.Vol 41(2): pp123-130.

Kohler T and DMaselli (2009): Mountains and climate change from understanding to action. Berne: Swiss Agency for Development and Cooperation

[Khattak M. S., Babel M. S., Sharif M \(2011\) Hydro-meteorological trends in the upper Indus River basin in Pakistan” Inter-Research, Climate Research, Vol. 46: 103–119, 2011 doi: 10.3354/cr00957](#)

Kulkarni, A. V., Mathur, P., Rathore, B. P., Suja Alex., Thakur ,N and Manoj et al., 2002. Effect of global warming on snow ablation pattern in the Himalaya., *Current Science*, 83: 120– 123.

Kumar V and Jain SK (2009). Trends in seasonal and annual rainfall and rainy days in Kashmir valley in the last century.*Quaternary International*. doi:10.1016/j.quaint.2009.08.006

Kunz, T., K. Fraedrich, and F. Lunkeit, 2009: Response of idealized baroclinic wave life cycles to stratospheric flow conditions.*J. Atmos. Sci.*, 66, 2288–2302, doi:10.1175/2009JAS2827.1.

Liu X, Cheng Z, Yan L, Yin ZY, (2009). Elevation dependency of recent and future minimum surface air temperature trends in the Tibetan Plateau and Its surroundings. *Global Planet Change* 68: 164-174.

Liu XB and Chen (2000). Climatic warming in the Tibetan Plateau during recent decades. *Journal of Climatology* 20:1729–1742.

Lo JCF, Yang ZL, Pielke RA Sr, (2008). Assessment of three dynamical climate downscaling methods using the weather research and forecasting (WRF) model. *J Geophys Res* 113:D09112. doi: 10.1029/2007JD009216

Lu, J., L. Sun, Y. Wu, and G. Chen, 2014: The role of subtropical irreversible PV mixing in the zonal mean circulation response to global warming-like thermal forcing. *J. Climate*, 27, 2297–2316, doi:10.1175/JCLI-D-13-00372.1.

Madala S, Satyanarayana ANV, Narayana Rao T (2014). Performance evaluation of PBL and cumulus parameterization schemes of WRF ARW model in simulating severe thunderstorm events over Gadanki MST radar facility — Case study, *Atmospheric Research*, 139: 1-17, doi:10.1016/j.atmosres.2013.12.017.

Mann ME, RS Bradley and M.K Hughes (1999). Northern Hemisphere Temperature During Past Millennium: Inferences, uncertainties and Limitations. *Geophysical Research Letters* 26(6):759-762.

McIntyre, M. E., and T. N. Palmer, (1983). Breaking planetary waves in the stratosphere. *Nature*, 305, 593–600.

Meehl, G. A., C. Covey, T. Delworth, M. Latif, B. McAvaney, J. F. B. Mitchell, R. J. Stouffer, and K. E. Taylor, (2007). The WRCP CMIP3 multi-model dataset: A new era in climate change research. *Bull. Amer. Meteor. Soc.*, 88, 1383–1394.

Mooley DA and Parthasarthy B, (1984). Fluctuations of all India summer monsoon rainfall during 1871–1978. *Climate Change* 6:287–301.

Murtaza KO and Romshoo SA (2016) Recent Glacier Changes in the Kashmir Alpine Himalayas, India. *Geocarto International* 32 (2), 188-205

Nibanupudi, H. K., Gupta, A. K., and Rawat, P. K. Mountain Hazards and Disaster Risk, (2015): Mitigating Climatic and Human Induced Disaster Risks Through Ecosystem Resilience: Harmonizing Built and Natural Environments in the KHK Region, edited by: Nibanupudi, H. K. and Shaw, R., 139–158, doi:10.1007/978-4-431-55242-0, Springer, Tokyo, Japan.

Petoukhov, V., Rahmstorf, S., Petri, S., and Schellnhuber, H.J. (2013): Quasiresonant amplification of planetary waves and recent Northern Hemisphere weather extremes, *P. Natl. Acad. Sci. USA*, 110, 5336–5341.

Pettitt AN. 1979. A non-parametric approach to the change point problem. *Applied Statistics* 28: 126–135.

Postel, G. A., and M. H. Hitchman, 1999: Climatology of Rossby wave breaking along the subtropical tropopause. *J. Atmos. Sci.*, 56, 359–373.

Priyanka Ghosh, T. K. Ramkumar, V. Yesubabu and C. V. Naidu, Convection-generated high-frequency gravity waves as observed by MST radar and simulated by WRF model over the Indian tropical station of Gadanki Quarterly Journal of the Royal Meteorological Society *Q. J. R. Meteorol. Soc.* (2016) DOI:10.1002/qj.2887

Radziejewski M, Bardossy A, Kundzewicz ZW. 2000. Detection of change in river flow using phase randomization. *Hydrological Sciences Journal* 45: 547–558

Rashid I, Romshoo A S, R K Chaturvedi, NH Ravindranath, Raman Sukumar, Mathangi Jayaraman, Thatiparthi Vijaya Lakshmi and Jagmohan Sharma (2015). Projected Climate Change Impacts on Vegetation Distribution over Kashmir Himalaya. *Climatic Change*, DOI: 10.1007/s10584-015-1456-5

Rienecker, M. M., Suarez, M. J., Gelaro, R., Todling, R., Bacmeister, J., Liu, E., Bosilovich, M. G., Schubert, S. D., Takacs, L., Kim, G.-K., Bloom, S., Chen, J., Collins, D., Conaty, A., da Silva, A., Gu, W., Joiner, J., Koster, R. D., Lucchesi, R., Molod, A., Owens, T., Pawson, S., Pegion, P., Redder, C. R., Reichle, R., Robertson, F. R., Ruddick, A. G., Sienkiewicz, M., and Woollen, J.: MERRA: NASA's Modern-Era Retrospective Analysis for Research and Applications, *J. Climate*, 24, 3624–3648, doi:10.1175/JCLI-D-11-00015.1, 2011.

Rivière, G., 2011: A dynamical interpretation of the poleward shift of the jet streams in global warming scenarios. *J. Atmos. Sci.*, 68, 1253–1272, doi:10.1175/2011JAS3641.1.

Roe GH, Montgomery DR and Hallet B (2003). Orographic climate feedbacks and the relief of mountain ranges: *Journal of Geophysical Research*, v. 108, doi: 10.1029/2001JB001521.

Romshoo SA and Rashid I (2014). Assessing the impacts of changing land cover and climate on Hokersar wetland in Indian Himalayas. *Arabian Journal of Geoscience*. DOI: 10.1007/s12517-012-0761-9, 7 (1): 143–160

Romshoo SA, Dar RA, Rashid I, Marazi A, Ali N and Zaz SN (2015). Implications of Shrinking Cryosphere under Changing Climate on the Stream flows of the Upper Indus Basin. *Arctic, Antarctic and Alpine Research*, Vol. 47(4): 627–644, ISSN: 1938-4246 (IF: 1.67).

Romshoo SA, Altaf, S., Rashid I, and Dar RA (2017). Climatic, geomorphic and anthropogenic drivers of the 2014 extreme flooding in the Jhelum basin of Kashmir, India. *Geomatics, Natural Hazards and Risk*, Vol. 9 (1): 224-248

Schubert, S., Wang, H., and Suarez, M. (2011): Warm Season Subseasonal Variability and Climate Extremes in the Northern Hemisphere: The Role of Stationary Rossby Waves, *J. Climate*, 24, 4773–4792.

Screen, J. A. and Simmonds, I. (2014): Amplified mid-latitude planetary waves favour particular regional weather extremes, *Nature Climate Change*, 4, 704–709.

Sharif M, Archer RD, Fowler JH and Forsythe N (2012). Trends in timing and magnitude of flow in the Upper Indus Basin. *Hydrology and Earth System Science*. 9: 9931–9966

Sheikh MM, Manzoor N, Adnan M, Ashraf J and Khan AM. (2009) Climate Profile and past climate changes in Pakistan GCISC-RR-01 Global Change Impact studies Center Islamabad, Pakistan, ISBN: 978-969-9395-04-

Shrestha A B, Wake C P, Dobb J E, Mayewski P A, (1999). Precipitation fluctuations in the Nepal Himalaya and its vicinity and relationship with some large scale climatological parameters. *International Journal of Climatology* 20: 317–327

Shrestha ML, (2000). Interannual variation of summer monsoon rainfall over Nepal and its relation to Southern Oscillation Index: *Meteorology and Atmospheric Physics*, v. 75, p. 21–28, doi: 10.1007/s007030070012.

Srinivas C V, Hari Prasad D, Bhaskar Rao DV, Anjaneyulu Y, Baskaran R, Venkatraman B. (2013). Simulation of the Indian summer monsoon regional climate using advanced research WRF model. *Int. J. Climatol.*, 33: 1195-1210. doi:10.1002/joc.3505

Srinivasa CV, Yesubabu V, Hari Prasad D, Hari Prasad KBRR, Greeshmaa MM, Baskarana R, Venkatramana B (2018). Simulation of an extreme heavy rainfall event over Chennai, India using WRF: Sensitivity to grid resolution and boundary layer physics, 210: 66–82.

Singh P, Kumar, V Thomas, M Arora et al., (2008). Changes in rainfall and relative humidity in river basins in northwest and central India *Hydrological Processes*, Vol 22, 16: 2982-2992.

Sinha Ray, K. C. and Srivastava, A. K. (2000): Is there any change in extreme events like drought and heavy rainfall?, *Curr. Sci. India*, 79, 155–158.

Solomon S, Qin D, Manning M, Chen Z, Marquis M, Averyt KB, Tignor M and HL. Miller (eds) (2007): Climate change 2007: the physical science basis.

Swanson DK, Wooten and T Orr, (2009). Buckets of Ash Track Tephra Flux From Halema'uma'u Crater, Hawai'i, Eos Trans. AGU, 90(46), 427.

Syed FS, Giorgi F, Pal JS, King MP (2006) Effect of remote forcings on the winter precipitation of central southwest Asia part 1: observations. *Theor Appl Climatol*. doi:10.1007/200704-005-0217-1

Tandon, N. F., E. P. Gerber, A. H. Sobel, and L. M. Polvani, 2013: Understanding Hadley cell expansion versus contraction: Insights from simplified models and implications for recent observations. *J. Climate*, 26, 4304–4321, doi:10.1175/JCLI-D-12-00598.1.

Thompson LG, Mosley-Thompson E, Davis, M.E. Lin, P.N. Henderson. K, et al., 2003, "Tropical glacier and ice core evidence of climate change on annual to millennial time scales". *Climatic Change* 59: 137-155

Vose RS, Easterling DR, Gleason B. 2005. Maximum and minimum temperature trends for the globe: an update through 2004. *Geophysical Research Letters* 32:1–5.

Viswanadhapalli, Y. , Dasari, H. P., Langodan, S. , Challa, V. S. and Hoteit, I. (2017), Climatic features of the Red Sea from a regional assimilative model. *Int. J. Climatol.*, 37: 2563-2581. doi:10.1002/joc.4865

Waugh, D. W., and L. M. Polvani, 2000: Climatology of intrusions into the tropical upper troposphere. *Geophys. Res. Lett.*, 27, 3857–3860.

Wilcox, L. J., A. Charlton-Perez, and L. J. Gray, 2012: Trends in austral jet position in ensembles of high- and low-top CMIP5 models. *J. Geophys. Res.*, 117, D13115, doi:10.1029/2012JD017597.

Wiltshire AJ, (2013). Climate change implications for the glaciers of the Hindu-Kush Karakoram and Himalayan region. *Cryosphere*, 7: 3717–3748

Wittman, M. A., A. J. Charlton, and L. M. Polvani, 2007: The effect of lower stratospheric shear on baroclinic instability. *J. Atmos. Sci.*, 64, 479–496, doi:10.1175/JAS3828.1.

World Meteorological Organization (1970). Guide to Meteorological practices. 2nd Ed. WMO No 168. Tech Paper, 82, Geneva, Switzerland.

Yunling H and Yiping Z. (2005).Climate change from 1960-2000 in the Lancang River Valley, China. Mountain Research and Development Vol 25:4pp. 341-348

Zarenistana km,DhordeAG,KripalaniRH.2014.Temperatureanalysis over southwest Iran: trends and projections. Theoretical and Applied Climatology 116: 103–117.

# Table:

[Table 1: Annual and Seasonal temperature trend in Kashmir Valley during 1980-2010](#)

[Table 2: Annual and Seasonal Precipitation trends in Kashmir valley during 1980-2010](#)

[Table 3: Mean temperature increase at each station from 1980 to 2010](#)

Table [14](#): Statistics of temperature at all the six stations of Kashmir (1980-2010)

Table [25](#): Statistics of precipitation at all the six stations of Kashmir (1980-2010)

[Table 3: Mean temperature increase at each station from 1980 to 2010](#)

**Table 1: Annual and Seasonal temperature trend in Kashmir Valley**

| Stations | Temperature-Trend | Annual<br>t<br>S% | Min<br>S%   | Max<br>S%   | Winter<br>r<br>S% | Spring<br>g<br>S% | Summer<br>r<br>S=% | Autumn<br>n<br>S=% | Abrupt<br>Change |
|----------|-------------------|-------------------|-------------|-------------|-------------------|-------------------|--------------------|--------------------|------------------|
| Gulmarg  | +                 | <b>S=99</b>       | <b>S=99</b> | <b>S=99</b> | <b>S=95</b>       | <b>S=95</b>       | NS                 | <b>S=99</b>        | 1995             |
| Pahalgam | +                 | <b>S=99</b>       | <b>S=99</b> | <b>S=99</b> | <b>S=99</b>       | <b>S=99</b>       | <b>S=90</b>        | <b>S=95</b>        | 1995             |
| Srinagar | +                 | <b>S=95</b>       | <b>S=95</b> | <b>S=99</b> | <b>S=90</b>       | <b>S=95</b>       | NS                 | NS                 | 1995             |
| Kupwara  | +                 | <b>S=99</b>       | <b>S=95</b> | <b>S=99</b> | <b>S=90</b>       | <b>S=99</b>       | <b>S=90</b>        | <b>S=95</b>        | 1995             |
| kokarnag | +                 | <b>S=99</b>       | <b>S=99</b> | <b>S=99</b> | <b>S=99</b>       | <b>S=99</b>       | NS                 | <b>S=90</b>        | 1995             |
| Qazigund | +                 | <b>S=95</b>       | <b>S=99</b> | <b>S=99</b> | <b>S=90</b>       | <b>S=95</b>       | NS                 | <b>S=90</b>        | 1995             |

+ Increase; S= significance level ; NS = Insignificance; ~~Bold=~~ high significance

**Table 2: Annual and Seasonal Precipitation trends in Kashmir valley.**

| Stations | Precipitation | Annual | Winter | Spring | Summer | Autumn | Abrupt |
|----------|---------------|--------|--------|--------|--------|--------|--------|
|----------|---------------|--------|--------|--------|--------|--------|--------|

|          | Trend | S%          | S%   | S%          | S=% | S=% | Change |
|----------|-------|-------------|------|-------------|-----|-----|--------|
| Gulmarg  | -     | <b>S=95</b> | S=90 | <b>S=99</b> | NS  | NS  | 1995   |
| Pahalgam | -     | S=90        | S=90 | <b>S=99</b> | NS  | NS  | 1995   |
| Srinagar | -     | <b>S=95</b> | NS   | <b>S=99</b> | NS  | NS  | 1995   |
| Kupwara  | -     | S=90        | S=90 | <b>S=99</b> | NS  | NS  | 1995   |
| Kokarnag | -     | S=90        | S=90 | <b>S=95</b> | NS  | NS  | 1995   |
| Qazigund | -     | <b>S=95</b> | NS   | <b>S=99</b> | NS  | NS  | 1995   |

-Decreasing; S= significance level ; NS = Insignificance; Bold = high significance

**Table 3: Mean temperature increase at each station from during 1980-20160.**

| Stations | Elevation in meters | Topography                                                          | Increase annual temperature in °C |
|----------|---------------------|---------------------------------------------------------------------|-----------------------------------|
| Pahalgam | 2600mts             | <u>Located on mountain top</u>                                      | 1.13                              |
| Gulmarg  | 2740mts             | <u>Located on mountain top</u>                                      | 1.04                              |
| Srinagar | 1600mts             | <u>Located on plane surface in an urbanized area</u>                | 0.55                              |
| Kupwara  | 1670mts             | <u>Located on plane surface bounded on three sides by mountains</u> | 0.92                              |
| Kokarnag | 2000mts             | <u>Located on plane surface</u>                                     | 0.99                              |
| Qazigund | 1650mts             | <u>Located on plane surface</u>                                     | 0.78                              |

**Table 14: Test sStatistics of temperature at all the six stations of Kashmir (1980-20160)**

| Gulmarg | Test statistic | Critical values |  | Result |
|---------|----------------|-----------------|--|--------|
|---------|----------------|-----------------|--|--------|

| Temperature                 |                   | (Statistical table) |       |        |        |          |
|-----------------------------|-------------------|---------------------|-------|--------|--------|----------|
|                             |                   |                     | a=0.1 | a=0.05 | a=0.01 |          |
| Annual                      | Mann-Kendall      | 2.923               | 1.645 | 1.96   | 2.576  | S (0.01) |
|                             | Linear Regression | 3.12                | 1.699 | 2.045  | 2.756  | S (0.01) |
|                             | Student's t       | -2.564              | 1.697 | 2.042  | 2.75   | S (0.05) |
| Maximum                     |                   | 1.782               | 1.645 | 1.96   | 2.576  | S (0.1)  |
|                             |                   | 1.942               | 1.699 | 2.045  | 2.756  | S (0.1)  |
|                             |                   | -2.114              | 1.697 | 2.042  | 2.75   | S (0.05) |
| Minimum                     |                   | 3.059               | 1.645 | 1.96   | 2.576  | S (0.01) |
|                             |                   | 3.79                | 1.699 | 2.045  | 2.756  | S (0.01) |
|                             |                   | -3.194              | 1.697 | 2.042  | 2.75   | S (0.01) |
| Winter                      |                   | 2.43                | 1.645 | 1.96   | 2.576  | S (0.05) |
|                             |                   | 2.259               | 1.699 | 2.045  | 2.756  | S (0.05) |
|                             |                   | -2.805              | 1.697 | 2.042  | 2.75   | S (0.01) |
| Spring                      |                   | 2.006               | 1.645 | 1.96   | 2.576  | S (0.05) |
|                             |                   | 2.224               | 1.699 | 2.045  | 2.756  | S (0.05) |
|                             |                   | -2.025              | 1.697 | 2.042  | 2.75   | S (0.1)  |
| Summer                      |                   | 0.986               | 1.645 | 1.96   | 2.576  | NS       |
|                             |                   | 0.829               | 1.699 | 2.045  | 2.756  | NS       |
|                             |                   | -1.193              | 1.697 | 2.042  | 2.75   | NS       |
| Autumn                      |                   | 2.859               | 1.645 | 1.96   | 2.576  | S (0.01) |
|                             |                   | 2.32                | 1.699 | 2.045  | 2.756  | S (0.05) |
|                             |                   | -2.322              | 1.697 | 2.042  | 2.75   | S (0.05) |
|                             |                   |                     |       |        |        |          |
| <b>Pahalgam Temperature</b> |                   |                     |       |        |        |          |
| Annual                      |                   | 4.119               | 1.645 | 1.96   | 2.576  | S (0.01) |
|                             |                   | 3.996               | 1.645 | 1.96   | 2.576  | S (0.01) |
|                             |                   | -1.985              | 1.696 | 2.04   | 2.745  | S (0.1)  |
| Maximum                     |                   | 3.519               | 1.645 | 1.96   | 2.576  | S (0.01) |
|                             |                   | 4.457               | 1.697 | 2.042  | 2.75   | S (0.01) |
|                             |                   | -3.152              | 1.696 | 2.04   | 2.745  | S (0.01) |
| Minimum                     |                   | 3.6                 | 1.645 | 1.96   | 2.576  | S (0.01) |
|                             |                   | 4.553               | 1.697 | 2.042  | 2.75   | S (0.01) |
|                             |                   | -1.554              | 1.696 | 2.04   | 2.745  | NS       |
| Winter                      |                   | 3.811               | 1.645 | 1.96   | 2.576  | S (0.01) |
|                             |                   | 3.856               | 1.697 | 2.042  | 2.75   | S (0.01) |
|                             |                   | -2.482              | 1.696 | 2.04   | 2.745  | S (0.05) |
| Spring                      |                   | 3.438               | 1.645 | 1.96   | 2.576  | S (0.01) |
|                             |                   | 4.597               | 1.697 | 2.042  | 2.75   | S (0.01) |
|                             |                   | -3.166              | 1.696 | 2.04   | 2.745  | S (0.01) |

|                             |        |       |       |       |          |
|-----------------------------|--------|-------|-------|-------|----------|
| Summer Temperature          | 1.719  | 1.645 | 1.96  | 2.576 | S (0.1)  |
|                             | 1.915  | 1.697 | 2.042 | 2.75  | S (0.1)  |
|                             | -1.451 | 1.696 | 2.04  | 2.745 | NS       |
| Autumn Temperature          | 2.416  | 1.645 | 1.96  | 2.576 | S (0.05) |
|                             | 2.46   | 1.697 | 2.042 | 2.75  | S (0.05) |
|                             | -1.823 | 1.696 | 2.04  | 2.745 | S (0.1)  |
| <b>Kokarnag Temperature</b> |        |       |       |       |          |
| Annual                      | 3.62   | 1.645 | 1.96  | 2.576 | S (0.01) |
|                             | 3.998  | 1.699 | 2.045 | 2.756 | S (0.01) |
|                             | -2.194 | 1.697 | 2.042 | 2.75  | S (0.05) |
| Maximum                     | 3.11   | 1.645 | 1.96  | 2.576 | S (0.01) |
|                             | 3.622  | 1.699 | 2.045 | 2.756 | S (0.01) |
|                             | -3.104 | 1.697 | 2.042 | 2.75  | S (0.01) |
| Minimum                     | 2.763  | 1.645 | 1.96  | 2.576 | S (0.01) |
|                             | 2.776  | 1.699 | 2.045 | 2.756 | S (0.01) |
|                             | -1.28  | 1.697 | 2.042 | 2.75  | NS       |
| Winter                      | 3.195  | 1.645 | 1.96  | 2.576 | S (0.01) |
|                             | 3.518  | 1.699 | 2.045 | 2.756 | S (0.01) |
|                             | -1.632 | 1.697 | 2.042 | 2.75  | NS       |
| Spring                      | 3.195  | 1.645 | 1.96  | 2.576 | S (0.01) |
|                             | 3.469  | 1.699 | 2.045 | 2.756 | S (0.01) |
|                             | -2.133 | 1.697 | 2.042 | 2.75  | S (0.05) |
| Summer                      | 1.462  | 1.645 | 1.96  | 2.576 | NS       |
|                             | 1.108  | 1.699 | 2.045 | 2.756 | NS       |
|                             | -1.527 | 1.697 | 2.042 | 2.75  | NS       |
| Autumn                      | 1.680  | 1.645 | 1.96  | 2.576 | S(0.1)   |
|                             | 1.023  | 1.699 | 2.045 | 2.756 | NS       |
|                             | -0.315 | 1.697 | 2.042 | 2.75  | NS       |
| <b>Kupwara Temperature</b>  |        |       |       |       |          |
| Annual                      | 3.433  | 1.645 | 1.96  | 2.576 | S (0.01) |
|                             | 3.745  | 1.699 | 2.045 | 2.756 | S (0.01) |
|                             | -2.384 | 1.697 | 2.042 | 2.75  | S (0.05) |
| Maximum                     | 3.246  | 1.645 | 1.96  | 2.576 | S (0.01) |
|                             | 3.842  | 1.699 | 2.045 | 2.756 | S (0.01) |
|                             | -3.303 | 1.697 | 2.042 | 2.75  | S (0.01) |
| Minimum                     | 1.819  | 1.645 | 1.96  | 2.576 | S (0.1)  |
|                             | 2.331  | 1.699 | 2.045 | 2.756 | S (0.05) |
|                             | -1.485 | 1.697 | 2.042 | 2.75  | NS       |
| Winter                      | 1.785  | 1.645 | 1.96  | 2.576 | S (0.1)  |

|                             |          |       |       |       |          |
|-----------------------------|----------|-------|-------|-------|----------|
|                             | 1.797    | 1.699 | 2.045 | 2.756 | S (0.1)  |
|                             | -1.643   | 1.697 | 2.042 | 2.75  | NS       |
| Spring                      | 2.719    | 1.645 | 1.96  | 2.576 | S (0.01) |
|                             | 2.98     | 1.699 | 2.045 | 2.756 | S (0.01) |
|                             | -3.297   | 1.697 | 2.042 | 2.75  | S (0.01) |
| Summer                      | 1.785    | 1.645 | 1.96  | 2.576 | S (0.1)  |
|                             | 2.605    | 1.699 | 2.045 | 2.756 | S (0.05) |
|                             | -2.477   | 1.697 | 2.042 | 2.75  | S (0.05) |
| Autumn                      | 2.085    | 1.645 | 1.96  | 2.576 | S (0.05) |
|                             | 2.003    | 1.699 | 2.045 | 2.756 | S (0.05) |
|                             | -1.917   | 1.697 | 2.042 | 2.75  | S (0.1)  |
| <b>Srinagar Temperature</b> |          |       |       |       |          |
| Annual                      | 2.108    | 1.645 | 1.96  | 2.576 | S (0.05) |
|                             | 2.243    | 1.699 | 2.045 | 2.756 | S (0.05) |
|                             | -2.133   | 1.697 | 2.042 | 2.75  | S (0.05) |
| Maximum                     | 2.804    | 1.645 | 1.96  | 2.576 | S (0.01) |
|                             | 3.27     | 1.699 | 2.045 | 2.756 | S (0.01) |
|                             | -2.456   | 1.697 | 2.042 | 2.75  | S (0.05) |
| Minimum                     | -1.791   | 1.645 | 1.96  | 2.576 | S(0.1)   |
|                             | -1.799   | 1.699 | 2.045 | 2.756 | S(0.1)   |
|                             | Infinity | 1.697 | 2.042 | 2.75  | S (0.01) |
| Winter                      | 1.694    | 1.645 | 1.96  | 2.576 | S(0.1)   |
|                             | 1.871    | 1.699 | 2.045 | 2.756 | S(0.1)   |
|                             | -0.454   | 1.697 | 2.042 | 2.75  | NS       |
| Spring                      | 2.413    | 1.645 | 1.96  | 2.576 | S (0.05) |
|                             | 2.164    | 1.699 | 2.045 | 2.756 | S (0.05) |
|                             | -2.523   | 1.697 | 2.042 | 2.75  | S (0.05) |
| Summer                      | 1.374    | 1.645 | 1.96  | 2.576 | S(0.1)   |
|                             | 1.273    | 1.699 | 2.045 | 2.756 | S(0.1)   |
|                             | -0.174   | 1.697 | 2.042 | 2.75  | NS       |
| Autumn                      | 0.918    | 1.645 | 1.96  | 2.576 | NS       |
|                             | 1.099    | 1.699 | 2.045 | 2.756 | NS       |
|                             | -0.73    | 1.697 | 2.042 | 2.75  | NS       |
| <b>Qazigund Temperature</b> |          |       |       |       |          |
| Annual                      | 2.057    | 1.645 | 1.96  | 2.576 | S (0.05) |
|                             | 1.961    | 1.645 | 1.96  | 2.576 | S (0.05) |
|                             | Infinity | 1.697 | 2.042 | 2.75  | S (0.01) |
| Maximum                     | 1.983    | 1.645 | 1.96  | 2.576 | S (0.05) |
|                             | 1.844    | 1.699 | 2.045 | 2.756 | S(0.05)  |

|         |          |       |       |       |          |
|---------|----------|-------|-------|-------|----------|
|         | -0.034   | 1.697 | 2.042 | 2.75  | NS       |
| Minimum | 1.683    | 1.645 | 1.96  | 2.576 | S (0.1)  |
|         | 1.683    | 1.645 | 1.96  | 2.576 | S (0.1)  |
|         | Infinity | 1.697 | 2.042 | 2.75  | S (0.01) |
| Winter  | 2.023    | 1.645 | 1.96  | 2.576 | S (0.05) |
|         | 1.843    | 1.699 | 2.045 | 2.756 | S (0.1)  |
|         | -0.838   | 1.697 | 2.042 | 2.75  | NS       |
| Spring  | 2.036    | 1.645 | 1.96  | 2.576 | S (0.05) |
|         | 1.922    | 1.699 | 2.045 | 2.756 | S (0.1)  |
|         | -1.996   | 1.645 | 1.96  | 2.576 | S (0.05) |
| Summer  | 1.714    | 1.645 | 1.96  | 2.576 | S(0.1)   |
|         | -1.124   | 1.699 | 2.045 | 2.756 | NS       |
|         | 0.808    | 1.697 | 2.042 | 2.75  | NS       |
| Autumn  | -1.802   | 1.645 | 1.96  | 2.576 | S (0.1)  |
|         | -1.74    | 1.699 | 2.045 | 2.756 | S (0.1)  |
|         | 1.55     | 1.697 | 2.042 | 2.75  | NS       |
|         |          |       |       |       |          |

**Table 25: Test Statistics of precipitation at all the six stations of Kashmir (1980-2016)**

| Gulmarg precipitation |                   | Test statistic | Critical values     |       | Result |          |
|-----------------------|-------------------|----------------|---------------------|-------|--------|----------|
|                       |                   |                | (Statistical table) |       |        |          |
|                       |                   | a=0.1          | a=0.05              |       | a=0.01 |          |
| Annual                | Mann-Kendall      | -1.915         | 1.645               | 1.96  | 2.576  | S(0.1)   |
|                       | Linear regression | -2.442         | 1.699               | 2.045 | 2.756  | S (0.05) |
|                       | Student's t       | 3.214          | 1.697               | 2.042 | 2.75   | S (0.01) |
| Winter                |                   | -0.193         | 1.645               | 1.96  | 2.576  | S(0.1)   |
|                       |                   | 0.186          | 1.699               | 2.045 | 2.756  | S(0.1)   |
|                       |                   | 1.946          | 1.697               | 2.042 | 2.75   | S (0.1)  |
| Spring                |                   | -2.515         | 1.645               | 1.96  | 2.576  | S (0.01) |
|                       |                   | -2.922         | 1.699               | 2.045 | 2.756  | S (0.01) |
|                       |                   | 3.209          | 1.697               | 2.042 | 2.75   | S (0.01) |
| Summer                |                   | -1.445         | 1.645               | 1.96  | 2.576  | NS       |
|                       |                   | -0.803         | 1.699               | 2.045 | 2.756  | NS       |
|                       |                   | -0.629         | 1.697               | 2.042 | 2.75   | NS       |
| Autumn                |                   | -1.394         | 1.645               | 1.96  | 2.576  | NS       |
|                       |                   | -1.428         | 1.699               | 2.045 | 2.756  | NS       |
|                       |                   | 1.001          | 1.697               | 2.042 | 2.75   | NS       |

|                                   |        |       |       |       |          |
|-----------------------------------|--------|-------|-------|-------|----------|
| <b>Pahalgam<br/>precipitation</b> |        |       |       |       |          |
| Annual                            | -0.425 | 1.645 | 1.96  | 2.576 | NS       |
|                                   | -0.702 | 1.699 | 2.045 | 2.756 | S=(0.1)  |
|                                   | 1.773  | 1.697 | 2.042 | 2.75  | S (0.1)  |
| Winter                            | -0.176 | 1.645 | 1.96  | 2.576 | S(0.1)   |
|                                   | 0.104  | 1.699 | 2.045 | 2.756 | NS       |
|                                   | 1.946  | 1.697 | 2.042 | 2.75  | S (0.1)  |
| Spring                            | -2.915 | 1.645 | 1.96  | 2.576 | S (0.01) |
|                                   | -2.851 | 1.699 | 2.045 | 2.756 | S (0.01) |
|                                   | 2.479  | 1.697 | 2.042 | 2.75  | S (0.05) |
| Summer                            | 1.156  | 1.645 | 1.96  | 2.576 | NS       |
|                                   | 1.535  | 1.699 | 2.045 | 2.756 | NS       |
|                                   | -1.387 | 1.697 | 2.042 | 2.75  | NS       |
| Autumn                            | 0.034  | 1.645 | 1.96  | 2.576 | NS       |
|                                   | 0.348  | 1.699 | 2.045 | 2.756 | NS       |
|                                   |        |       |       |       | NS       |
|                                   | -0.622 | 1.697 | 2.042 | 2.75  |          |
| <b>Kokarnag<br/>precipitation</b> |        |       |       |       |          |
| <i>Station</i>                    | -1.326 | 1.645 | 1.96  | 2.576 | S=(0.1)  |
| Annual Precipitation              | -1.436 | 1.645 | 1.96  | 2.576 | S=(0.1)  |
| Winter precipitation              | -1.93  | 1.645 | 1.96  | 2.576 | S(0.1)   |
|                                   | -1.592 | 1.699 | 2.045 | 2.756 | NS       |
| Spring Precipitation              | -2.176 | 1.645 | 1.96  | 2.576 | S (0.05) |
|                                   | -2.525 | 1.699 | 2.045 | 2.756 | S (0.05) |
| Summer Precipitation              | 0.187  | 1.645 | 1.96  | 2.576 | NS       |
|                                   | -0.154 | 1.699 | 2.045 | 2.756 | NS       |
| Autumn Precipitation              | -0.901 | 1.645 | 1.96  | 2.576 | NS       |
|                                   | -0.903 | 1.645 | 1.96  | 2.576 | NS       |
| <b>Srinagar<br/>precipitation</b> |        |       |       |       |          |
| Annual                            | -2.532 | 1.645 | 1.96  | 2.576 | S (0.05) |
|                                   | -2.931 | 1.699 | 2.045 | 2.756 | S (0.05) |
|                                   | 3.094  | 1.697 | 2.042 | 2.75  | S (0.01) |
| Winter                            | -1.096 | 1.645 | 1.96  | 2.576 | NS       |
|                                   | -1.071 | 1.649 | 2.045 | 2.756 | NS       |
|                                   | 0.584  | 1.697 | 2.042 | 2.75  | NS       |
| Spring                            | -2.906 | 1.645 | 1.96  | 2.576 | S (0.01) |
|                                   | 3.741  | 1.699 | 2.045 | 2.756 | S (0.01) |

|                                   |        |       |       |       |          |
|-----------------------------------|--------|-------|-------|-------|----------|
|                                   | 3.205  | 1.697 | 2.042 | 2.75  | S (0.01) |
| Summer                            | -1.105 | 1.645 | 1.96  | 2.576 | NS       |
|                                   | -0.92  | 1.699 | 2.045 | 2.756 | NS       |
|                                   | 0.673  | 1.697 | 2.042 | 2.75  | NS       |
| Autumn                            | -1.003 | 1.645 | 1.96  | 2.576 | NS       |
|                                   | -1.014 | 1.645 | 1.96  | 2.576 | NS       |
|                                   | 0.761  | 1.697 | 2.042 | 2.75  | NS       |
| <b>Qazigund<br/>Precipitation</b> |        |       |       |       |          |
| Annual                            | -2.275 | 1.645 | 1.96  | 2.576 | S(0.05)  |
|                                   | -1.976 | 1.645 | 1.96  | 2.576 | S(0.05)  |
|                                   | 1.946  | 1.697 | 2.042 | 2.75  | S (0.1)  |
| Winter                            | -0.746 | 1.645 | 1.96  | 2.576 | NS       |
|                                   | -0.733 | 1.645 | 1.96  | 2.576 | NS       |
|                                   | -0.315 | 1.696 | 2.04  | 2.745 | NS       |
| Spring                            | -2.587 | 1.645 | 1.96  | 2.576 | S(0.01)  |
|                                   | -2.706 | 1.645 | 1.96  | 2.576 | S(0.01)  |
|                                   | -0.773 | 1.696 | 2.04  | 2.745 | NS       |
| Summer                            | 0.859  | 1.645 | 1.96  | 2.576 | NS       |
|                                   | 0.567  | 1.645 | 1.96  | 2.576 | NS       |
|                                   | -1.078 | 1.696 | 2.04  | 2.745 | NS       |
| Autumn                            | -0.632 | 1.645 | 1.96  | 2.576 | NS       |
|                                   | -0.702 | 1.645 | 1.96  | 2.576 | NS       |
|                                   | 0.525  | 1.696 | 2.04  | 2.745 | NS       |
| <b>Kupwara<br/>Precipitation</b>  |        |       |       |       |          |
| Annual                            | -1.962 | 1.645 | 1.96  | 2.576 | S (0.1)  |
|                                   | -1.059 | 1.645 | 1.96  | 2.576 | S (0.1)  |
|                                   | 3.045  | 1.699 | 2.045 | 2.756 | S (0.01) |
| Winter                            | -0.117 | 1.645 | 1.96  | 2.576 | NS       |
|                                   | 0.195  | 1.645 | 1.96  | 2.576 | S(0.1)   |
|                                   | 2.479  | 1.697 | 2.042 | 2.75  | S (0.05) |
| Spring                            | -2.962 | 1.645 | 1.96  | 2.576 | S (0.01) |
|                                   | -3.059 | 1.645 | 1.96  | 2.576 | S (0.01) |
|                                   | 1.773  | 1.697 | 2.042 | 2.75  | S (0.1)  |
| Summer                            | -0.153 | 1.645 | 1.96  | 2.576 | NS       |
|                                   | -0.084 | 1.645 | 1.96  | 2.576 | NS       |
|                                   | 0.143  | 1.697 | 2.042 | 2.75  | NS       |
| Autumn                            | -0.153 | 1.645 | 1.96  | 2.576 | NS       |
|                                   | -0.084 | 1.645 | 1.96  | 2.576 | NS       |
|                                   | -0.031 | 1.697 | 2.042 | 2.75  | NS       |

**Table 3: Mean temperature increase at each station from during 1980-2016.**

| <u>Stations</u> | <u>Elevation in meters</u> | <u>Topography</u>                                                   | <u>Increase annual temperature in °C</u> |
|-----------------|----------------------------|---------------------------------------------------------------------|------------------------------------------|
| <u>Pahalgam</u> | <u>2600mts</u>             | <u>Located on mountain top</u>                                      | <u>1.13</u>                              |
| <u>Gulmarg</u>  | <u>2740mts</u>             | <u>Located on mountain top</u>                                      | <u>1.04</u>                              |
| <u>Srinagar</u> | <u>1600mts</u>             | <u>Located on plane surface in an urbanized area</u>                | <u>0.55</u>                              |
| <u>Kupwara</u>  | <u>1670mts</u>             | <u>Located on plane surface bounded on three sides by mountains</u> | <u>0.92</u>                              |
| <u>Kokarnag</u> | <u>2000mts</u>             | <u>Located on plane surface</u>                                     | <u>0.99</u>                              |
| <u>Qazigund</u> | <u>1650mts</u>             | <u>Located on plane surface</u>                                     | <u>0.78</u>                              |

**Figure captions:**

Fig. 1. Geographical setting and topographic map (elevation in meter is above mean sea level) of the Kashmir Valley along with marked locations of six meteorological observation stations: Srinagar, Gulmarg, Pahalgam, Kokarnag, Qazigund and Kupwara

Fig. 2 (a-g). Trends in surface temperature (°C) at the six interested locations of the Kashmir valley. (a) for annual mean temperature, (b) maximum temperature, (c) minimum temperature, (d) winter mean temperature during December-February, (e) spring mean temperature (March-May), (f) summer mean temperature (June-August) and (g) autumn mean temperature (September-November).

Fig. 3 (a-e). Same as Fig. 2 but for precipitation (mm) and only for means of (a) annual, (b) winter, (c) spring, (d) summer and (e) autumn.

Fig. 4 (a).Cumulative testing for defining change point of temperature (averaged for all the six stations of the Kashmir valley), (b) same as (a) but for precipitation, (c) Comparison of trends of Kashmir temperature with North Atlantic Ocean (NAO index (d) same as (c) but for precipitation, (e) regression analysis of winter temperature and (f) regression analysis of winter precipitation.

Fig. 5. (a).Comparison between observed and WRF model (location of Kokarnag is considered) simulated annually averaged temperature (averaged for all the stations) variations for the years 1980-20160, (b) same as (a) but for spring season, (c) for summer, (d) for autumn, (e) winter, (f) for minimum temperature and (g) maximum temperature

Fig. 6. Same as Fig. 5 but for precipitation. Here the minimum and maximum precipitation are not considered because it cannot be defined them properly in a day.

Fig. 76 (a-f).Observed monthly-averaged surface temperature and precipitation and ERA-interim potential vorticities at the 350 K potential temperature and 200 ~~mb~~-hPa level pressure surfaces for the station, Srinagar during the years 1980-20160.

Fig. 87 (a-f).Same as the Fig. 6 but for Kokarnag.

Fig. 98 (a-f).Same as the Fig. 7 but for Kupwara.

Fig. 109 (a-f).Same as the Fig. 8 but for Pahalgam.

Fig. 119 (a-f).Same as the Fig. 9 but for Qazigund.

Fig. 124 (a-f).Same as the Fig. 10 but for Gulmarg.

Fig. 132 (a-f).Same as the Fig. 11 but for all the stations and during the years 2011-2016.

Fig. 143. (a-f).Synopitc scale ERA-interim meridional wind velocity covering the Jammu and Kashmir region for sis days from 01 to 06 September 2014 (historical record flooding rainfall over this region).
